# Supplementary material for: Coiled-coil heterodimer-based recruitment of an exonuclease to CRISPR/Cas for enhanced gene editing
Source: PubMed Central journal article supplement (PMC9226073; doi:10.1038/s41467-022-31386-1), 2022-06-23
Supplement: 41467_2022_31386_MOESM2_ESM.pdf [file 41467_2022_31386_MOESM2_ESM.pdf]

## Reporting Summary

Nature Portfolio wishes to improve the reproducibility of the work that we publish. This form provides structure for consistency and transparency in reporting. For further information on Nature Portfolio policies, see our [Editorial Policies](#) and the [Editorial Policy Checklist](#).

### Statistics

For all statistical analyses, confirm that the following items are present in the figure legend, table legend, main text, or Methods section.

n/a Confirmed

- |                                     |                                     |                                                                                                                                                                                                                                                            |
|-------------------------------------|-------------------------------------|------------------------------------------------------------------------------------------------------------------------------------------------------------------------------------------------------------------------------------------------------------|
| <input type="checkbox"/>            | <input checked="" type="checkbox"/> | The exact sample size ( $n$ ) for each experimental group/condition, given as a discrete number and unit of measurement                                                                                                                                    |
| <input type="checkbox"/>            | <input checked="" type="checkbox"/> | A statement on whether measurements were taken from distinct samples or whether the same sample was measured repeatedly                                                                                                                                    |
| <input type="checkbox"/>            | <input checked="" type="checkbox"/> | The statistical test(s) used AND whether they are one- or two-sided<br><i>Only common tests should be described solely by name; describe more complex techniques in the Methods section.</i>                                                               |
| <input type="checkbox"/>            | <input checked="" type="checkbox"/> | A description of all covariates tested                                                                                                                                                                                                                     |
| <input type="checkbox"/>            | <input checked="" type="checkbox"/> | A description of any assumptions or corrections, such as tests of normality and adjustment for multiple comparisons                                                                                                                                        |
| <input type="checkbox"/>            | <input checked="" type="checkbox"/> | A full description of the statistical parameters including central tendency (e.g. means) or other basic estimates (e.g. regression coefficient) AND variation (e.g. standard deviation) or associated estimates of uncertainty (e.g. confidence intervals) |
| <input type="checkbox"/>            | <input checked="" type="checkbox"/> | For null hypothesis testing, the test statistic (e.g. $F$ , $t$ , $r$ ) with confidence intervals, effect sizes, degrees of freedom and $P$ value noted<br><i>Give <math>P</math> values as exact values whenever suitable.</i>                            |
| <input checked="" type="checkbox"/> | <input type="checkbox"/>            | For Bayesian analysis, information on the choice of priors and Markov chain Monte Carlo settings                                                                                                                                                           |
| <input checked="" type="checkbox"/> | <input type="checkbox"/>            | For hierarchical and complex designs, identification of the appropriate level for tests and full reporting of outcomes                                                                                                                                     |
| <input checked="" type="checkbox"/> | <input type="checkbox"/>            | Estimates of effect sizes (e.g. Cohen's $d$ , Pearson's $r$ ), indicating how they were calculated                                                                                                                                                         |

*Our web collection on [statistics for biologists](#) contains articles on many of the points above.*

### Software and code

Policy information about [availability of computer code](#)

Data collection

clone <https://github.com/tsailabSJ/circleseq.git> for CIRCLe-seq analysis of NGS-obtained sequences, hg38 for CIRCLe-seq analysis

Data analysis

clone <https://github.com/tsailabSJ/circleseq.git> and hg38 for CIRCLe-seq analysis of NGS obtained sequences, Phyton v2.7, BWA 0.7.17 and SAMtools 1.9 for CIRCLe-seq data analysis, Phyton 3.7 and Matplotlib 3.5 for Manhattan plot visualization, CRISPResso or Cas-analyzer for NGS amplicon analysis, ICE SyntheGO and TIDE on-line tool for sanger sequences analysis, FlowJo v10 and SpectroFlo for flow-cytometry analysis, Living Image® 4.5.2 (Perkin Elmer) for bioluminescence imaging quantification, Leica LAS AF Lite version 2.7.2.9586 for confocal images, ImageJ 1.53k for gel density analysis, Excel 2010 and Microsoft PowerPoint 2010, GraphPad Prism8, Biorender.com for schemes drawing.

For manuscripts utilizing custom algorithms or software that are central to the research but not yet described in published literature, software must be made available to editors and reviewers. We strongly encourage code deposition in a community repository (e.g. GitHub). See the Nature Portfolio [guidelines for submitting code & software](#) for further information.

### Data

Policy information about [availability of data](#)

All manuscripts must include a [data availability statement](#). This statement should provide the following information, where applicable:

- Accession codes, unique identifiers, or web links for publicly available datasets
- A description of any restrictions on data availability
- For clinical datasets or third party data, please ensure that the statement adheres to our [policy](#)

Exact P values from all analysis, CIRCLe-seq identified matches are provided in source Data file. All other data are available from the authors of the paper upon request. Data from NGS and CIRCLe-seq sequencing are deposited at NCBI SRA with accession number PRJNA849175.

## Field-specific reporting

Please select the one below that is the best fit for your research. If you are not sure, read the appropriate sections before making your selection.

Life sciences  Behavioural & social sciences  Ecological, evolutionary & environmental sciences

For a reference copy of the document with all sections, see [nature.com/documents/nr-reporting-summary-flat.pdf](https://www.nature.com/documents/nr-reporting-summary-flat.pdf)

## Life sciences study design

All studies must disclose on these points even when the disclosure is negative.

|                 |                                                                                                                                                                                                                                                                                                               |
|-----------------|---------------------------------------------------------------------------------------------------------------------------------------------------------------------------------------------------------------------------------------------------------------------------------------------------------------|
| Sample size     | We did not use any sample, size calculation; the sample size was chosen based on the published literature and Sample size was chosen depending on the technique used and based on our experience (Methods/Quantification and Statistical Analysis). No power calculations were performed to choose group size |
| Data exclusions | No data was excluded from the analysis.                                                                                                                                                                                                                                                                       |
| Replication     | At least three independent replicated experiments were performed except for the animal experiments (n=5), NGS analysis and PD1, where one replicate experiment were done. We used two different blood donors from CML patients. All attempts of replication were successful.                                  |
| Randomization   | In analysis, where cells were used, three independent measurements are presented. No randomization was carried out. In animal studies animals were randomly distributed between experimental groups.                                                                                                          |
| Blinding        | Blinding was performed in animal research. In tumor measurements, the person, who measured tumors was not aware of the group type. Otherwise no blinding was performed in other experiments.                                                                                                                  |

## Reporting for specific materials, systems and methods

We require information from authors about some types of materials, experimental systems and methods used in many studies. Here, indicate whether each material, system or method listed is relevant to your study. If you are not sure if a list item applies to your research, read the appropriate section before selecting a response.

### Materials & experimental systems

| n/a                                 | Involved in the study                                           |
|-------------------------------------|-----------------------------------------------------------------|
| <input type="checkbox"/>            | <input checked="" type="checkbox"/> Antibodies                  |
| <input type="checkbox"/>            | <input checked="" type="checkbox"/> Eukaryotic cell lines       |
| <input checked="" type="checkbox"/> | <input type="checkbox"/> Palaeontology and archaeology          |
| <input type="checkbox"/>            | <input checked="" type="checkbox"/> Animals and other organisms |
| <input type="checkbox"/>            | <input checked="" type="checkbox"/> Human research participants |
| <input checked="" type="checkbox"/> | <input type="checkbox"/> Clinical data                          |
| <input checked="" type="checkbox"/> | <input type="checkbox"/> Dual use research of concern           |

### Methods

| n/a                                 | Involved in the study                              |
|-------------------------------------|----------------------------------------------------|
| <input checked="" type="checkbox"/> | <input type="checkbox"/> ChIP-seq                  |
| <input type="checkbox"/>            | <input checked="" type="checkbox"/> Flow cytometry |
| <input checked="" type="checkbox"/> | <input type="checkbox"/> MRI-based neuroimaging    |

## Antibodies

|                 |                                                                                                                                                                                                                                                                                                                                                                                                                                                                                                                                                                                                 |
|-----------------|-------------------------------------------------------------------------------------------------------------------------------------------------------------------------------------------------------------------------------------------------------------------------------------------------------------------------------------------------------------------------------------------------------------------------------------------------------------------------------------------------------------------------------------------------------------------------------------------------|
| Antibodies used | mouse anti-CRISPR-Cas9 antibody (ab191468) from Abcam; 1:500<br>rabbit anti-Alpha/Beta tubulin antibody (2148) from Cell Signaling Technology; 1:2000<br>goat polyclonal anti-rabbit IgG (ab6721) from Abcam; 1:2000<br>goat anti-mouse IgG-HRP (sc-2005) from Santa Cruz; 1:2000<br>Alexa Fluor® 488 goat anti-mouse IgG (H+L) *2 mg/mL from Invitrogen (A11001); 1:2000<br>CD3 Antibody, anti-human, eFluor405 from Miltenyi Biotec (130-113-128); 1:50<br>CD279 (PD1)-PE-Vio770, human from Miltenyi Biotec (130-117-698); 1:50<br>CD47-FITC, human from Miltenyi Biotec (130-101-344); 1:50 |
| Validation      | All antibodies used in the study are commercially available and have been validated according to manufacturers manuals.                                                                                                                                                                                                                                                                                                                                                                                                                                                                         |

## Eukaryotic cell lines

Policy information about [cell lines](#)

|                     |                                                                                                                                                                                                                                          |
|---------------------|------------------------------------------------------------------------------------------------------------------------------------------------------------------------------------------------------------------------------------------|
| Cell line source(s) | human embryonic kidney (HEK) 293, mouse Neuro-2A, K562 cells and Jurkat cells were purchased from American Type Culture Collection (ATCC). The 293/GFP cell line, which stably expresses GFP, was purchased from Cell Biolabs. K562-fLUC |
|---------------------|------------------------------------------------------------------------------------------------------------------------------------------------------------------------------------------------------------------------------------------|

cells were a kind gift from Sebastien Wälchli (they generated the cells that stably expresses firefly luciferase). CML patient cells and PBMCs for T cell isolation were obtained from human volunteers upon their consent.

Authentication

None were authenticated.

Mycoplasma contamination

All cells were Mycoplasma negative.

Commonly misidentified lines  
(See [ICLAC](#) register)

No commonly misidentified cell lines were used in the study

## Animals and other organisms

Policy information about [studies involving animals](#); [ARRIVE guidelines](#) recommended for reporting animal research

Laboratory animals

female 8-10 weeks SCID C.B-478 17/IcrHsd-Prkdcscid mice (Envigo, Italy)  
female 8-10 weeks Hsd:ICR (CD-1) (Envigo, Italy)  
female 8-10 weeks BALB/c OlaHsd (Envigo, Italy)  
female 8-10 weeks B6(C)-Gt(ROSA)26Soreml.1(CAG-cas9\*,-EGFP)Rsky/J (JAX, USA)  
Laboratory animals were housed in IVC cages (Techniplast), fed standard chow (Mucedola) and tap water was provided ad libitum. Mice were maintained in 12-12 hour dark-light cycle at approximately 40-60% relative humidity with 22°C of ambient temperature. All animals, used in the study, were healthy; accompanied with health certificate from the animal vendor.

Wild animals

No wild animals were used in the study.

Field-collected samples

No field collected samples were used in the study.

Ethics oversight

Administration of the Republic of Slovenia for Food Safety, Veterinary and Plant Protection of the Ministry of Agriculture, Forestry and Foods, Republic of Slovenia (Permit Number U34401-3/2017/16, U34401-9/2020/9).

Note that full information on the approval of the study protocol must also be provided in the manuscript.

## Human research participants

Policy information about [studies involving human research participants](#)

Population characteristics

Samples (blood for PBMC isolation) were obtained with informed consent, and according to the study protocol approved by National Medical Ethics Committee (0120-600/2019/3). Blood was drawn regardless the age and gender of the volunteer. The main criteria was that they are healthy.  
Blood of CML patients for PBMC isolation was taken also from volunteers, regardless of the gender and age, the main criteria was that they did not get the CML therapy yet.

Recruitment

No specific recruitment of the participants was performed. The blood from the CML patients was drawn at the diagnosis of the disease.

Ethics oversight

National Medical Ethics Committee (permit number 0120-600/2019/3) of the Ministry of Health, Republic of Slovenia

Note that full information on the approval of the study protocol must also be provided in the manuscript.

## Flow Cytometry

### Plots

Confirm that:

- The axis labels state the marker and fluorochrome used (e.g. CD4-FITC).
- The axis scales are clearly visible. Include numbers along axes only for bottom left plot of group (a 'group' is an analysis of identical markers).
- All plots are contour plots with outliers or pseudocolor plots.
- A numerical value for number of cells or percentage (with statistics) is provided.

### Methodology

Sample preparation

Cells were washed with FACS buffer (PBS, 2% FBS) and resuspended in a 0.1 ml FACS buffer and then stained with appropriate antibodies.

Instrument

CyFlow (Partec) or the spectral flow cytometer Aurora with the blue, violet and red lasers (Cytek)

Software

Data were analyzed with FlowJo software (Tree Star) and SpectroFlo (Cytek) software.

Cell population abundance

NA

Gating strategy

Cells were gated on live cell population, upon which cell were visualized for specific staining.

Tick this box to confirm that a figure exemplifying the gating strategy is provided in the Supplementary Information.
